# Supplementary material
Source: Springer Nature journal article supplement (https://www.springermedizin.de/resource/supplementary/13046_2011_486_MOESM1_ESM.pdf/9662334)

PANC-1

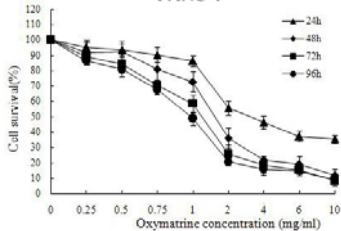

AsPC-1

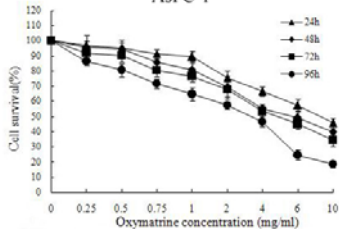

BxPc-3

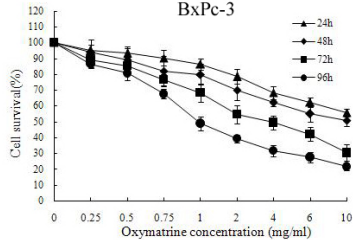

Supplement: MOESM1 [file 9662334]
